# Supplementary material for: The combination of preoperative fibrinogen and neutrophil-lymphocyte ratio is a predictive prognostic factor in esophagogastric junction and upper gastric cancer
Source: PubMed Central journal article supplement (PMC6775700; doi:10.7150/jca.31162), 2019-08-29
Supplement: jcav10p5518s1.pdf [file jcav10p5518s1.pdf]

**A**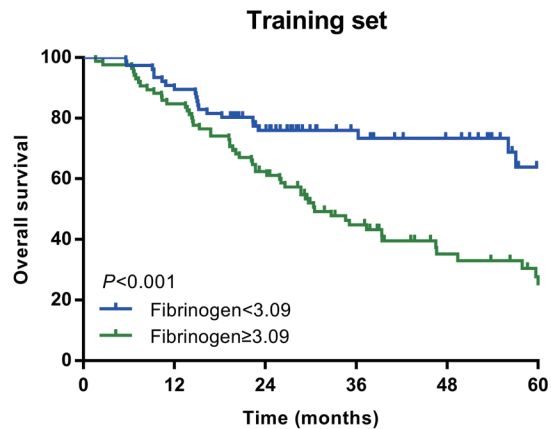**B**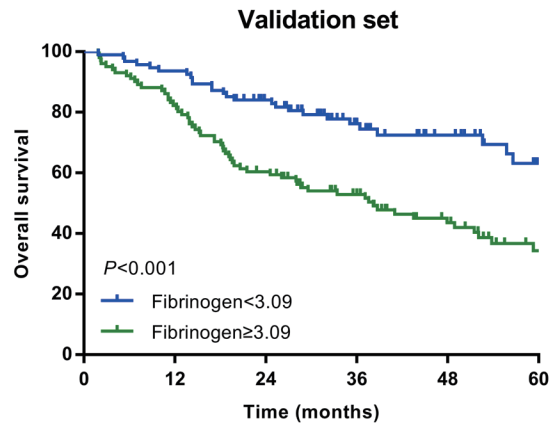**C**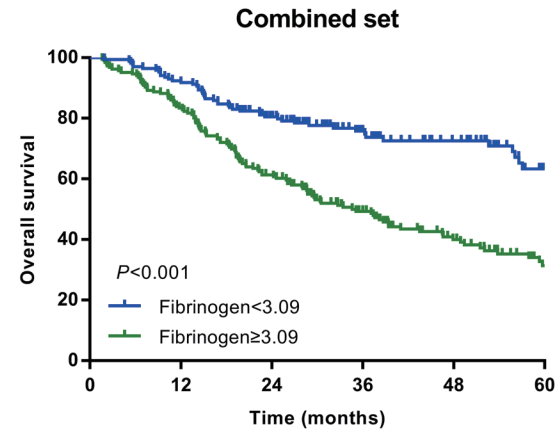**D**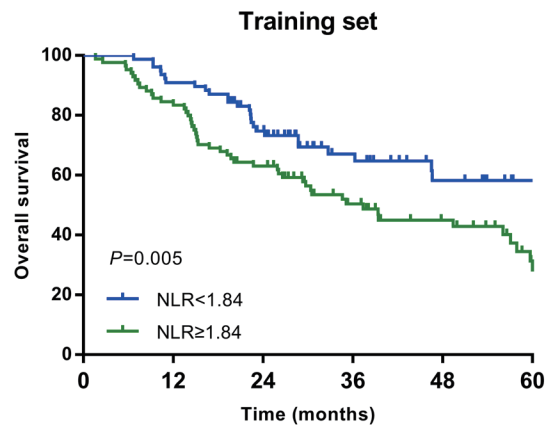**E**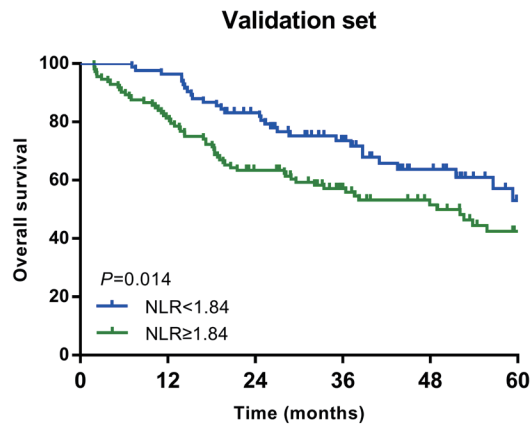**F**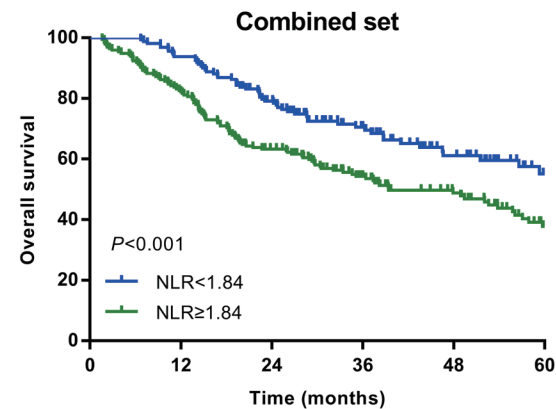

**Figure S1.** Survival curves of patients with AEG and UGC according to the combination of fibrinogen concentration and NLR (F-NLR). A-C, Overall survival (OS) of patients with fibrinogen<3.09g/L and fibrinogen≥3.09g/L in the A, training set ( $P<0.001$ ); B, validation set ( $P<0.001$ ); and C, combined set ( $P<0.001$ ). D-F, Overall survival (OS) of patients with NLR<1.84 and NLR≥1.84 in the D, training set ( $P=0.005$ ); E, validation set ( $P=0.014$ ); and F, combined set ( $P<0.001$ ).

**Table S1.** Correlation between preoperative F-NLR and clinicopathologic characteristics of patients with AEG and UGC.

| Characteristics       | F-NLR score | Training set |    |    |                  | Validation set |    |    |                  | Combined set |     |    |                  |
|-----------------------|-------------|--------------|----|----|------------------|----------------|----|----|------------------|--------------|-----|----|------------------|
|                       |             | 0            | 1  | 2  | P                | 0              | 1  | 2  | P                | 0            | 1   | 2  | P                |
| Sex                   |             |              |    |    | 0.337            |                |    |    | 0.957            |              |     |    | 0.605            |
| Female                |             | 12           | 15 | 8  |                  | 11             | 16 | 14 |                  | 22           | 32  | 22 |                  |
| Male                  |             | 33           | 48 | 45 |                  | 38             | 63 | 53 |                  | 72           | 110 | 98 |                  |
| Age(years)            |             |              |    |    | <b>0.007</b>     |                |    |    | 0.409            |              |     |    | <b>0.041</b>     |
| <60                   |             | 29           | 24 | 19 |                  | 22             | 29 | 22 |                  | 48           | 56  | 41 |                  |
| ≥60                   |             | 16           | 39 | 34 |                  | 27             | 50 | 45 |                  | 46           | 86  | 79 |                  |
| Tumor size(cm)        |             |              |    |    | <b>0.002</b>     |                |    |    | <b>0.012</b>     |              |     |    | <b>&lt;0.001</b> |
| <5                    |             | 24           | 36 | 14 |                  | 31             | 32 | 25 |                  | 57           | 66  | 39 |                  |
| ≥5                    |             | 21           | 27 | 39 |                  | 18             | 47 | 42 |                  | 37           | 76  | 81 |                  |
| Location              |             |              |    |    | 0.852            |                |    |    | <b>0.036</b>     |              |     |    | 0.331            |
| UGC                   |             | 28           | 37 | 30 |                  | 26             | 56 | 50 |                  | 54           | 94  | 79 |                  |
| AEG                   |             | 17           | 26 | 23 |                  | 23             | 23 | 17 |                  | 40           | 48  | 41 |                  |
| Differentiation       |             |              |    |    | 0.507            |                |    |    | 0.120            |              |     |    | 0.072            |
| Well/Moderate         |             | 13           | 15 | 10 |                  | 17             | 21 | 12 |                  | 30           | 36  | 22 |                  |
| Poor                  |             | 32           | 48 | 43 |                  | 32             | 58 | 55 |                  | 64           | 106 | 98 |                  |
| Surgical procedure    |             |              |    |    | 0.613            |                |    |    | 0.104            |              |     |    | 0.340            |
| Proxima gastrectomy   |             | 24           | 39 | 29 |                  | 37             | 45 | 42 |                  | 63           | 83  | 70 |                  |
| Total gastrectomy     |             | 21           | 24 | 24 |                  | 12             | 34 | 25 |                  | 31           | 59  | 50 |                  |
| PLR                   |             |              |    |    | <b>0.001</b>     |                |    |    | <b>&lt;0.001</b> |              |     |    | <b>&lt;0.001</b> |
| <110                  |             | 31           | 29 | 16 |                  | 34             | 30 | 12 |                  | 65           | 64  | 25 |                  |
| ≥110                  |             | 14           | 34 | 37 |                  | 15             | 49 | 55 |                  | 29           | 78  | 95 |                  |
| LMR                   |             |              |    |    | <b>&lt;0.001</b> |                |    |    | <b>0.003</b>     |              |     |    | <b>&lt;0.001</b> |
| <3.25                 |             | 4            | 25 | 24 |                  | 4              | 19 | 24 |                  | 9            | 45  | 47 |                  |
| ≥3.25                 |             | 41           | 38 | 29 |                  | 45             | 60 | 43 |                  | 85           | 97  | 73 |                  |
| SII                   |             |              |    |    | <b>&lt;0.001</b> |                |    |    | <b>&lt;0.001</b> |              |     |    | <b>&lt;0.001</b> |
| <451                  |             | 39           | 37 | 9  |                  | 47             | 42 | 13 |                  | 86           | 80  | 21 |                  |
| ≥451                  |             | 6            | 26 | 44 |                  | 2              | 37 | 54 |                  | 8            | 62  | 99 |                  |
| pTNM stage            |             |              |    |    | 0.104            |                |    |    | 0.101            |              |     |    | <b>0.009</b>     |
| I                     |             | 9            | 4  | 6  |                  | 11             | 15 | 5  |                  | 21           | 19  | 9  |                  |
| II                    |             | 15           | 27 | 14 |                  | 17             | 20 | 20 |                  | 34           | 44  | 36 |                  |
| III                   |             | 21           | 32 | 33 |                  | 21             | 44 | 42 |                  | 39           | 79  | 75 |                  |
| Adjuvant chemotherapy |             |              |    |    | 0.655            |                |    |    | 0.650            |              |     |    | 0.351            |

|     |    |    |    |    |    |    |    |    |    |
|-----|----|----|----|----|----|----|----|----|----|
| Yes | 21 | 28 | 28 | 26 | 46 | 34 | 41 | 64 | 63 |
| No  | 24 | 35 | 25 | 23 | 33 | 33 | 53 | 78 | 57 |

---

AEG: adenocarcinoma of esophagogastric junction; UGC: upper gastric cancer; PLR: platelet-lymphocyte ratio; LMR: lymphocyte-monocyte ratio; SII:(SII=N×P/L), which was based on neutrophil (N), platelet (P) and lymphocyte (L) counts; F-NLR: combination of fibrinogen concentration and neutrophil-lymphocyte ratio.

**Table S2.** The correlation between fibrinogen and NLR of patients with AEG and UGC

| Patient cohort | Item       |          | NLR       |            | P                |
|----------------|------------|----------|-----------|------------|------------------|
|                |            |          | <1.84(%)  | ≥1.84(%)   |                  |
| Training set   | Fibrinogen | <3.09(%) | 45(28.0%) | 31(19.2%)  | <b>0.030</b>     |
|                |            | ≥3.09(%) | 32(19.9%) | 53(32.9%)  |                  |
| Validation set | Fibrinogen | <3.09(%) | 49(25.1%) | 45(23.1%)  | <b>&lt;0.001</b> |
|                |            | ≥3.09(%) | 34(17.4%) | 67(34.4%)  |                  |
| Combined set   | Fibrinogen | <3.09(%) | 94(26.4%) | 76(21.4%)  | <b>&lt;0.001</b> |
|                |            | ≥3.09(%) | 66(18.5%) | 120(33.7%) |                  |

NLR: neutrophil-lymphocyte ratio; AEG: adenocarcinoma of esophagogastric junction; UGC: upper gastric cancer.
